# Supplementary material
Source: PubMed Central journal article supplement (PMC2941241)
Supplement: NIHMS225430-supplement-supp_additional_details.pdf [file NIHMS225430-supplement-supp_additional_details.pdf]

Supplementary Information for “Atomic Forces for Geometry-Dependent Point Multipole and Gaussian Multipole Models” by D.M. Elking et al.

Additional Mathematical Derivations

**Introduction**

In this section of the Supplementary Information, additional mathematical details and derivations are provided. In section S1, a short discussion on the Cartesian rotation matrix derivative  $\mathbf{A}^\Omega \equiv (\partial\mathbf{R}/\partial\Omega)\mathbf{R}^{-1}$  matrix is given. The results for atomic gradients of Cartesian rotation matrices  $(\partial\mathbf{R}/\partial\mathbf{r}_{a',q})\mathbf{R}^{-1}$  are derived in sections S2-S5. In sections S6, S7, and S8 the general expression for  $\partial D^l_{m'm}/\partial\Omega$  is applied to the cases when  $\Omega$  is an infinitesimal rotation, an Euler angle, and a quaternion, respectively. Lastly, the results  $\boldsymbol{\tau}_a = \boldsymbol{\alpha} \times \mathbf{F}_{a \rightarrow \text{N1}}^{\text{orient}} + \boldsymbol{\beta} \times \mathbf{F}_{a \rightarrow \text{N2}}^{\text{orient}}$  and  $\sum_{a'} \mathbf{r}_{a'} \times \partial\eta/\partial\mathbf{r}_{a'} = 0$ , which are used in the main text, are derived in sections S9 and S10, respectively.

**S1) Note on Cartesian Rotation Matrix Derivatives  $\mathbf{A}^\Omega \equiv (\partial\mathbf{R}/\partial\Omega)\mathbf{R}^{-1}$**

For many cases of  $\Omega$ , the matrix  $\mathbf{A}^\Omega \equiv (\partial\mathbf{R}/\partial\Omega)\mathbf{R}^{-1}$  is antisymmetric, i.e.  $\mathbf{A}^\Omega_{ij} = -\mathbf{A}^\Omega_{ji}$ . For example, if  $\Omega$  is an Euler angle or a rotation about a coordinate axis,  $\mathbf{A}^\Omega$  is antisymmetric. If  $\mathbf{R}(\Omega)$  is an orthogonal rotation matrix for all of values of  $\Omega$ , then the following relation holds

$$\mathbf{R}(\Omega)\mathbf{R}^T(\Omega) = \mathbf{I}, \quad (\text{S1.1})$$

where  $\mathbf{I}$  is the constant identity matrix, and  $\mathbf{R}^{-1} = \mathbf{R}^T$  for real orthogonal Cartesian rotation matrices. After taking the derivative with respect to  $\Omega$  of both sides of eqn. S1.1, the following result is obtained

$$\frac{\partial\mathbf{R}}{\partial\Omega}\mathbf{R}^T + \left(\frac{\partial\mathbf{R}}{\partial\Omega}\mathbf{R}^T\right)^T = 0, \quad (\text{S1.2})$$

which shows that  $\mathbf{A}^\Omega \equiv (\partial\mathbf{R}/\partial\Omega)\mathbf{R}^{-1}$  is antisymmetric. For the cases when  $\Omega$  is an Euler angle or a rotation about a coordinate axis,  $\mathbf{A}^\Omega$  is antisymmetric. Since an antisymmetric matrix  $\mathbf{A}$  has the general form

$$\mathbf{A} \equiv \begin{pmatrix} 0 & -a_3 & a_2 \\ a_3 & 0 & -a_1 \\ -a_2 & a_1 & 0 \end{pmatrix}, \quad (\text{S1.3})$$

the infinitesimal rotation matrices  $\mathbf{M}_i$  defined in eqn. 28 of the main text forms a basis for  $\mathbf{A}$ , i.e.

$$\mathbf{A} = \sum_{i=1}^3 a_i \mathbf{M}_i . \quad (\text{S1.4})$$

A similar argument applies to  $\bar{\mathbf{A}}^\Omega \equiv \mathbf{R}^{-1}(\partial\mathbf{R}/\partial\Omega) = \mathbf{R}^{-1}\mathbf{A}^\Omega\mathbf{R}$ .

If  $\mathbf{R}(\Omega)$  is a rotation matrix for only a limited subspace of the values for  $\Omega$ , then eqn. S1.1 holds for the values in which  $\mathbf{R}(\Omega)$  is a rotation matrix, i.e.  $\mathbf{R}(\Omega)\mathbf{R}^T(\Omega) = \mathbf{I}(\Omega)$ . In this case,  $\mathbf{I}(\Omega)$  is the identity matrix only for the values in which  $\mathbf{R}(\Omega)$  is a rotation matrix. Eqn. S1.2 is no longer valid, since  $\partial\mathbf{I}/\partial\Omega$  is not necessarily zero. An example is quaternions  $(q_0, q_1, q_2, q_3)$ , which satisfy an equation of constraint,  $\sum_{\mu=0}^3 q_\mu^2 = 1$ . In section S8, it is shown that  $(\partial\mathbf{R}/\partial q_\mu)\mathbf{R}^{-1}$  is not antisymmetric.

## S2) Preliminary note on Cartesian vectors

The expressions for  $(\partial\mathbf{R}/\partial\mathbf{r}_{a',q})\mathbf{R}^{-1}$  are derived using Cartesian vector analysis. In order to provide a more economical derivation of  $(\partial\mathbf{R}/\partial\mathbf{r}_{a',q})\mathbf{R}^{-1}$ , the Kronecker-delta  $\delta_{ij}$  and Levi-Cita  $\varepsilon_{ijk}$  symbols<sup>70</sup> are used to express Cartesian vectors in component form. The  $\delta_{ij}$  and  $\varepsilon_{ijk}$  symbols allow efficient evaluation and manipulations of vector equations and identities. These conventions are outlined below.

Suppose  $\mathbf{a}$  and  $\mathbf{b}$  are two arbitrary three dimensional vectors given by

$$\mathbf{a} \equiv (a_1, a_2, a_3) \equiv a_1\hat{x}_1 + a_2\hat{x}_2 + a_3\hat{x}_3 \quad (\text{S2.1})$$

$$\mathbf{b} \equiv (b_1, b_2, b_3) \equiv b_1\hat{x}_1 + b_2\hat{x}_2 + b_3\hat{x}_3 . \quad (\text{S2.2})$$

where  $\hat{x}_p$  is the global or fixed coordinate basis for three dimensional space defined by  $\hat{x}_1 \equiv (1,0,0)$ ,  $\hat{x}_2 \equiv (0,1,0)$ , and  $\hat{x}_3 \equiv (0,0,1)$ . The conventions used in this work can be summarized by the following rules:

- 1) Repeated indexes are summed over. For example,  $a_i b_i \equiv \sum_{i=1}^3 a_i b_i$ .
- 2) The Kronecker-Delta symbol is defined by  $\delta_{pq} \equiv \begin{cases} 1 & \text{if } p = q \\ 0 & \text{if } p \neq q \end{cases}$
- 3) The antisymmetric Levi-Cita symbol  $\varepsilon_{ijk}$  is defined by  $\varepsilon_{123} = \varepsilon_{312} = \varepsilon_{231} = 1$ ,  $\varepsilon_{321} = \varepsilon_{132} = \varepsilon_{213} = -1$ , and  $\varepsilon_{ijk} = 0$  if any index is repeated, e.g.  $\varepsilon_{112} = 0$
- 4) The magnitude of a vector  $\mathbf{a}$  is given by  $a \equiv |\mathbf{a}| = \sqrt{a_1^2 + a_2^2 + a_3^2}$

A scalar or dot product between two vectors  $\mathbf{a} \equiv a_i\hat{x}_i$  and  $\mathbf{b} \equiv b_i\hat{x}_i$  can be represented by

$$\mathbf{a} \cdot \mathbf{b} = a_i b_i , \quad (\text{S2.3})$$

and a vector or cross product between two vectors  $\mathbf{a}$  and  $\mathbf{b}$  can be represented by

$$\mathbf{a} \times \mathbf{b} = a_i b_j \varepsilon_{ijk} \hat{x}_k. \quad (\text{S2.4})$$

In particular, the  $k^{\text{th}}$  component of  $\mathbf{a} \times \mathbf{b}$  is given by

$$(\mathbf{a} \times \mathbf{b})_k = a_i b_j \varepsilon_{ijk}. \quad (\text{S2.5})$$

The following important result can be readily verified

$$\varepsilon_{ijt} \varepsilon_{pqt} = \delta_{ip} \delta_{jq} - \delta_{iq} \delta_{jp}. \quad (\text{S2.6})$$

Note the  $\hat{x}_i$  basis is orthonormal and right-handed, i.e.

$$\hat{x}_i \cdot \hat{x}_j = \delta_{ij} \quad (\text{S2.7})$$

$$\hat{x}_i \times \hat{x}_j = \varepsilon_{ijk} \hat{x}_k \quad (\text{S2.8})$$

Eqn. S2.7 is a short hand way of expressing  $\hat{x}_1 \cdot \hat{x}_1 = 1$ ,  $\hat{x}_1 \cdot \hat{x}_2 = 0$ , ..., while eqn. S2.8 is short for  $\hat{x}_1 \times \hat{x}_2 = \hat{x}_3$ ,  $\hat{x}_2 \times \hat{x}_3 = \hat{x}_1$ , and  $\hat{x}_3 \times \hat{x}_1 = \hat{x}_2$ .

### S3) Derivation of the local basis vector gradients

The local frame basis vectors  $\hat{x}_i'$  for the type of local frame defined in Figure 1 of the main text are defined in terms of the bond vectors  $\boldsymbol{\alpha} \equiv \mathbf{r}_{N1} - \mathbf{r}_a$  and  $\boldsymbol{\beta} = \mathbf{r}_{N2} - \mathbf{r}_a$  by

$$\begin{aligned} \hat{x}_1' &\equiv \frac{\boldsymbol{\alpha}}{\alpha} & \hat{x}_2' &\equiv \frac{\boldsymbol{\gamma}}{\gamma} \\ \boldsymbol{\gamma} &\equiv \boldsymbol{\beta} - \frac{\boldsymbol{\alpha} \cdot \boldsymbol{\beta}}{\alpha^2} \boldsymbol{\alpha} & \hat{x}_3' &\equiv \hat{x}_1' \times \hat{x}_2' \end{aligned} \quad (\text{S3.1})$$

It will be convenient to express the basis vectors in component form by

$$\begin{aligned} \hat{x}_{1,p}' &\equiv \frac{\alpha_p}{\alpha} & \hat{x}_{2,p}' &\equiv \frac{\gamma_p}{\gamma} \\ \gamma_p &\equiv \beta_p - \frac{\beta_s \alpha_s}{\alpha^2} \alpha_p & \hat{x}_{3,p}' &\equiv \hat{x}_{1,s}' \hat{x}_{2,t}' \varepsilon_{stp} \end{aligned} \quad (\text{S3.2})$$

The local basis vectors are orthonormal and right handed, i.e.  $\hat{x}_i' \cdot \hat{x}_j' = \delta_{ij}$  and  $\hat{x}_i' \times \hat{x}_j' = \varepsilon_{ijk} \hat{x}_k'$ .

The Cartesian rotation matrix  $\mathbf{R}$  from local to global frames is constructed by the column vectors of  $\hat{x}_i'$  by

$$\mathbf{R} = \begin{pmatrix} \hat{x}_1' & \hat{x}_2' & \hat{x}_3' \\ \downarrow & \downarrow & \downarrow \end{pmatrix}. \quad (\text{S3.3})$$

or in component form,  $\mathbf{R}_{pi} = \hat{x}_{i,p}'$ . The result for  $(\partial \mathbf{R}_a / \partial \mathbf{r}_{a',q}) \mathbf{R}_a^{-1}$  ( $a' = a, N1, N2$ ;  $q = 1, 2, 3$  for  $x, y, z$ ) are found by first deriving expressions for  $(\partial \mathbf{R} / \partial \alpha_q) \mathbf{R}^{-1}$  and  $(\partial \mathbf{R} / \partial \beta_q) \mathbf{R}^{-1}$ . The corresponding results for  $(\partial \mathbf{R} / \partial \mathbf{r}_{a',q}) \mathbf{R}^{-1}$  can be found from  $(\partial \mathbf{R} / \partial \alpha_q) \mathbf{R}^{-1}$  and  $(\partial \mathbf{R} / \partial \beta_q) \mathbf{R}^{-1}$  by a simple chain rule argument.

$$\begin{aligned}
\frac{\partial \mathbf{R}}{\partial \mathbf{r}_{N1,q}} \mathbf{R}^{-1} &= \frac{\partial \mathbf{R}}{\partial \alpha_q} \mathbf{R}^{-1} \\
\frac{\partial \mathbf{R}}{\partial \mathbf{r}_{N2,q}} \mathbf{R}^{-1} &= \frac{\partial \mathbf{R}}{\partial \beta_q} \mathbf{R}^{-1} \\
\frac{\partial \mathbf{R}}{\partial \mathbf{r}_{a,q}} \mathbf{R}^{-1} &= - \left( \frac{\partial \mathbf{R}}{\partial \alpha_q} \mathbf{R}^{-1} + \frac{\partial \mathbf{R}}{\partial \beta_q} \mathbf{R}^{-1} \right)
\end{aligned} \tag{S3.4}$$

Since the Cartesian rotation matrix  $\mathbf{R}$  is constructed from the *relative* atomic positions  $\mathbf{a} \equiv \mathbf{r}_{N1} - \mathbf{r}_1$  and  $\mathbf{b} = \mathbf{r}_{N2} - \mathbf{r}_1$ ,  $\mathbf{R}$  is translationally invariant, i.e.  $(\partial \mathbf{R} / \partial \mathbf{r}_{N1,q}) \mathbf{R}^{-1} + (\partial \mathbf{R} / \partial \mathbf{r}_{N2,q}) \mathbf{R}^{-1} + (\partial \mathbf{R} / \partial \mathbf{r}_{a,q}) \mathbf{R}^{-1} = 0$ .

The general strategy for calculating  $(\partial \mathbf{R} / \partial \alpha_q) \mathbf{R}^{-1}$  and  $(\partial \mathbf{R} / \partial \beta_q) \mathbf{R}^{-1}$  is described as follows.

Derivatives of  $\hat{x}_{i,p}' = \mathbf{R}_{pi}$  with respect to  $\alpha_q$  and  $\beta_q$  are found by differentiating eqn. S3.2. The derivatives  $\partial \hat{x}_{i,p}' / \partial \alpha_q$  and  $\partial \hat{x}_{i,p}' / \partial \beta_q$  are then converted back to the local basis vectors  $\hat{x}_{i,p}'$  by

$$\begin{aligned}
\alpha_p &= \alpha \hat{x}_{1,p}' \\
\beta_p &= \gamma \hat{x}_{2,p}' + \frac{\mathbf{b} \cdot \mathbf{a}}{\alpha} \hat{x}_{1,p}'
\end{aligned} \tag{S3.5}$$

The results for  $\partial \hat{x}_{i,p}' / \partial \alpha_q = \partial \mathbf{R}_{pi} / \partial \alpha_q$  and  $\partial \hat{x}_{i,p}' / \partial \beta_q = \partial \mathbf{R}_{pi} / \partial \beta_q$  are right multiplied by

$\mathbf{R}_{ir}^{-1} = \mathbf{R}_{ri} = \hat{x}_{i,r}'$  and summed in section S4. The orthonormal property  $\hat{x}_p' \cdot \hat{x}_q' = \delta_{pq}$  is used to derive compact expressions for  $(\partial \mathbf{R}_{pi} / \partial \alpha_q) \mathbf{R}_{ri}$  and  $(\partial \mathbf{R}_{pi} / \partial \beta_q) \mathbf{R}_{ri}$ , which are then converted back into bond vectors  $\mathbf{a}$  and  $\mathbf{b}$ . Lastly, the antisymmetric matrices  $(\partial \mathbf{R} / \partial \alpha_q) \mathbf{R}^{-1}$  and  $(\partial \mathbf{R} / \partial \beta_q) \mathbf{R}^{-1}$  are expressed in the infinitesimal rotation matrix  $\mathbf{M}_p$  basis in section S5. This last result is used to demonstrate the relationship between orientation force and torque.

#### A) Derivatives of $\hat{x}_{1,p}' = \mathbf{R}_{p1}$

The derivative of  $\hat{x}_{1,p}'$  with respect to  $\alpha_q$  is given by differentiating  $\hat{x}_{1,p}'$  in eqn. S3.2

$$\frac{\partial}{\partial \alpha_q} \hat{x}_{1,p}' = \frac{\delta_{pq}}{\alpha} - \frac{\alpha_p \alpha_q}{\alpha^3} = \frac{1}{\alpha} (\delta_{pq} - \hat{x}_{1,p}' \hat{x}_{1,q}') \tag{S3.6}$$

while the derivative  $\hat{x}_{1,p}'$  with respect to  $\beta_q$  is zero,

$$\frac{\partial}{\partial \beta_q} \hat{x}_{1,p}' = 0 \tag{S3.7}$$

#### B) Derivatives of $\hat{x}_{2,p}' = \mathbf{R}_{p2}$

The derivatives of  $\hat{x}_{2,p}'$  with respect to  $\alpha_q$  or  $\beta_q$  can be derived through a chain rule argument using  $\gamma_r$  as an intermediate. For example,

$$\frac{\partial}{\partial \alpha_q} \hat{x}_{2,p}' = \frac{\partial \hat{x}_{2,p}'}{\partial \gamma_r} \frac{\partial \gamma_r}{\partial \alpha_q} \quad (\text{S3.8})$$

The result for  $\partial \hat{x}_{2,p}' / \partial \gamma_r$  has a form identical to eqn. S3.6

$$\frac{\partial \hat{x}_{2,p}'}{\partial \gamma_r} = \frac{1}{\gamma} (\delta_{pr} - \hat{x}_{2,p}' \hat{x}_{2,r}') \quad (\text{S3.9})$$

$\partial \gamma_r / \partial \alpha_q$  is given by

$$\begin{aligned} \frac{\partial}{\partial \alpha_q} \gamma_r &= \frac{\partial}{\partial \alpha_q} \left( \beta_r - \frac{(\beta_s \alpha_s) \alpha_r}{\alpha^2} \right) = -\beta_s \frac{\partial}{\partial \alpha_q} \left( \frac{\alpha_s \alpha_r}{\alpha^2} \right) \\ &= -\beta_s \left( \frac{\delta_{qs} \alpha_r + \alpha_s \delta_{qr}}{\alpha^2} - \frac{2\alpha_s \alpha_r \alpha_q}{\alpha^4} \right) \\ &= \frac{\boldsymbol{\beta} \cdot \boldsymbol{\alpha}}{\alpha^2} (\hat{x}_{1,q}' \hat{x}_{1,r}' - \delta_{qr}) - \frac{\gamma}{\alpha} \hat{x}_{2,q}' \hat{x}_{1,r}' \end{aligned} \quad (\text{S3.10})$$

Similarly  $\partial \gamma_r / \partial \beta_q$  is given by

$$\begin{aligned} \frac{\partial}{\partial \beta_q} \gamma_r &= \frac{\partial}{\partial \beta_q} \left( \beta_r - \frac{(\beta_s \alpha_s) \alpha_r}{\alpha^2} \right) = \delta_{qr} - \frac{\alpha_q \alpha_r}{\alpha^2} \\ &= \delta_{qr} - \hat{x}_{1,q}' \hat{x}_{1,r}' \end{aligned} \quad (\text{S3.11})$$

Recall the local frame basis is constructed to be orthonormal, i.e.  $\hat{x}_{1,p}' \hat{x}_{1,p}' = \hat{x}_{2,p}' \hat{x}_{2,p}' = 1$ , and

$\hat{x}_{1,p}' \hat{x}_{2,p}' = 0$ . After inserting eqns. S3.9 and S3.10 into eqn. S3.8, the desired result for  $\partial \hat{x}_{2,p}' / \partial \alpha_q$

becomes

$$\begin{aligned} \frac{\partial}{\partial \alpha_q} \hat{x}_{2,p}' &= \frac{1}{\gamma} (\delta_{pr} - \hat{x}_{2,p}' \hat{x}_{2,r}') \left( \frac{\boldsymbol{\beta} \cdot \boldsymbol{\alpha}}{\alpha^2} (\hat{x}_{1,q}' \hat{x}_{1,r}' - \delta_{qr}) - \frac{\gamma}{\alpha} \hat{x}_{2,q}' \hat{x}_{1,r}' \right) \\ &= \frac{\boldsymbol{\beta} \cdot \boldsymbol{\alpha}}{\gamma \alpha^2} (\hat{x}_{1,p}' \hat{x}_{1,q}' + \hat{x}_{2,p}' \hat{x}_{2,q}' - \delta_{pq}) - \frac{1}{\alpha} \hat{x}_{1,p}' \hat{x}_{2,q}' \\ &= -\frac{\boldsymbol{\beta} \cdot \boldsymbol{\alpha}}{\gamma \alpha^2} \hat{x}_{3,p}' \hat{x}_{3,q}' - \frac{1}{\alpha} \hat{x}_{1,p}' \hat{x}_{2,q}' \end{aligned} \quad (\text{S3.12})$$

The last line follows from

$$\hat{x}_{1,p}' \hat{x}_{1,q}' + \hat{x}_{2,p}' \hat{x}_{2,q}' + \hat{x}_{3,p}' \hat{x}_{3,q}' = \mathbf{R}_{pi} \mathbf{R}_{qi} = \mathbf{R}_{pi} \mathbf{R}_{iq}^{-1} = \delta_{pq}. \quad (\text{S3.13})$$

Similarly,  $\partial \hat{x}_{2,p}' / \partial \beta_q$  is given by combining eqns. S3.9 and S3.11

$$\begin{aligned}
\frac{\partial}{\partial \beta_q} \hat{x}_{2,p}' &= \frac{1}{\gamma} (\delta_{pr} - \hat{x}_{2,p}' \hat{x}_{2,r}') (\delta_{qr} - \hat{x}_{1,q}' \hat{x}_{1,r}') \\
&= \frac{1}{\gamma} (\delta_{pq} - \hat{x}_{1,p}' \hat{x}_{1,q}' - \hat{x}_{2,p}' \hat{x}_{2,q}') \\
&= \frac{1}{\gamma} \hat{x}_{3,p}' \hat{x}_{3,q}'
\end{aligned} \tag{S3.14}$$

### C) Derivatives of $\hat{x}_{3,p}' = \mathbf{R}_{p3}$

The expressions for  $\partial \hat{x}_{1,p}' / \partial \alpha_q$  and  $\partial \hat{x}_{2,p}' / \partial \alpha_q$  are used to find  $\partial \hat{x}_{3,p}' / \partial \alpha_q$  by differentiating eqn. S3.2

$$\begin{aligned}
\frac{\partial \hat{x}_{3,p}'}{\partial \alpha_q} &= \frac{\partial}{\partial \alpha_q} (\hat{x}_{1,s}' \hat{x}_{2,t}' \varepsilon_{stp}) \\
&= \frac{\partial \hat{x}_{1,s}'}{\partial \alpha_q} \hat{x}_{2,t}' \varepsilon_{stp} + \hat{x}_{1,s}' \frac{\partial \hat{x}_{2,t}'}{\partial \alpha_q} \varepsilon_{stp}
\end{aligned} \tag{S3.15}$$

After inserting eqns. S3.6 and S3.12 into eqn. S3.15,  $\partial \hat{x}_{3,p}' / \partial \alpha_q$  becomes

$$\begin{aligned}
\frac{\partial \hat{x}_{3,p}'}{\partial \alpha_q} &= \frac{\partial \hat{x}_{1,s}'}{\partial \alpha_q} \hat{x}_{2,t}' \varepsilon_{stp} + \hat{x}_{1,s}' \frac{\partial \hat{x}_{2,t}'}{\partial \alpha_q} \varepsilon_{stp} \\
&= \frac{1}{\alpha} (\delta_{sq} - \hat{x}_{1,s}' \hat{x}_{1,q}') \hat{x}_{2,t}' \varepsilon_{stp} + \\
&\quad \hat{x}_{1,s}' \left( -\frac{\boldsymbol{\beta} \cdot \boldsymbol{\alpha}}{\gamma \alpha^2} \hat{x}_{3,t}' \hat{x}_{3,q}' - \frac{1}{\alpha} \hat{x}_{1,t}' \hat{x}_{2,q}' \right) \varepsilon_{stp} \\
&= \frac{1}{\alpha} (\varepsilon_{pqt} \hat{x}_{2,t}' - \hat{x}_{3,p}' \hat{x}_{1,q}') + \frac{\boldsymbol{\beta} \cdot \boldsymbol{\alpha}}{\gamma \alpha^2} \hat{x}_{2,p}' \hat{x}_{3,q}'
\end{aligned} \tag{S3.16}$$

where  $\hat{x}_1' \times \hat{x}_2' = \hat{x}_3'$ ,  $\hat{x}_3' \times \hat{x}_1' = \hat{x}_2'$ ,  $\hat{x}_2' \times \hat{x}_3' = \hat{x}_1'$  has been used. Eqn. S3.16 can be simplified by first recalling the result  $\varepsilon_{ijt} \varepsilon_{pqt} = \delta_{ip} \delta_{jq} - \delta_{iq} \delta_{jp}$  from eqn. S2.6 and noting

$$\begin{aligned}
\hat{x}_{3,p}' \hat{x}_{1,q}' - \hat{x}_{1,p}' \hat{x}_{3,q}' &= \hat{x}_{3,i}' \hat{x}_{1,j}' (\delta_{ip} \delta_{jq} - \delta_{iq} \delta_{jp}) \\
&= \hat{x}_{3,i}' \hat{x}_{1,j}' \varepsilon_{ijt} \varepsilon_{pqt} = (\hat{x}_3' \times \hat{x}_1')_t \varepsilon_{pqt} \\
&= \hat{x}_{2,t}' \varepsilon_{pqt}
\end{aligned} \tag{S3.17}$$

Inserting eqns. S3.17 into S3.16,  $\partial \hat{x}_{3,p}' / \partial \alpha_q$  becomes

$$\frac{\partial \hat{x}_{3,p}'}{\partial \alpha_q} = -\frac{1}{\alpha} \hat{x}_{1,p}' \hat{x}_{3,q}' + \frac{\boldsymbol{\beta} \cdot \boldsymbol{\alpha}}{\gamma \alpha^2} \hat{x}_{2,p}' \hat{x}_{3,q}' \tag{S3.18}$$

Similarly, the result for  $\partial \hat{x}_{3,p}' / \partial \beta_q$  can be found by combining eqns. S3.7 and S3.14,

$$\begin{aligned}
\frac{\partial \hat{x}_{3,p}'}{\partial \beta_q} &= \frac{\partial \hat{x}_{1,s}'}{\partial \beta_q} \hat{x}_{2,t}' \varepsilon_{stp} + \hat{x}_{1,s}' \frac{\partial \hat{x}_{2,t}'}{\partial \beta_q} \varepsilon_{stp} \\
&= \hat{x}_{1,s}' \frac{1}{\gamma} \hat{x}_{3,t}' \hat{x}_{3,q}' \varepsilon_{stp} \\
&= -\frac{1}{\gamma} \hat{x}_{2,p}' \hat{x}_{3,q}'
\end{aligned} \tag{S3.19}$$

#### S4) Derivation of $(\partial \mathbf{R} / \partial \alpha_q) \mathbf{R}^{-1}$ and $(\partial \mathbf{R} / \partial \beta_q) \mathbf{R}^{-1}$

In this section, the  $\mathbf{A}_{pr}^{\alpha_q}$  and  $\mathbf{A}_{pr}^{\beta_q}$  matrices given by

$$\mathbf{A}_{pr}^{\alpha_q} \equiv \frac{\partial \mathbf{R}_{pi}}{\partial \alpha_q} \mathbf{R}_{ir}^{-1} = \frac{\partial \hat{x}_{i,p}'}{\partial \alpha_q} \hat{x}_{i,r}' \tag{S4.1}$$

$$\mathbf{A}_{pr}^{\beta_q} \equiv \frac{\partial \mathbf{R}_{pi}}{\partial \beta_q} \mathbf{R}_{ir}^{-1} = \frac{\partial \hat{x}_{i,p}'}{\partial \beta_q} \hat{x}_{i,r}' \tag{S4.2}$$

will be derived.  $\mathbf{A}_{pr}^{\alpha_q}$  can be found by inserting eqns. S3.6, S3.12, and S3.18 into S4.1

$$\begin{aligned}
\mathbf{A}_{pr}^{\alpha_q} &= \frac{\partial \hat{x}_{1,p}'}{\partial \alpha_q} \hat{x}_{1,r}' + \frac{\partial \hat{x}_{2,p}'}{\partial \alpha_q} \hat{x}_{2,r}' + \frac{\partial \hat{x}_{3,p}'}{\partial \alpha_q} \hat{x}_{3,r}' \\
&= \frac{1}{\alpha} \left( \delta_{pq} - \hat{x}_{1,p}' \hat{x}_{1,q}' \right) \hat{x}_{1,r}' - \left( \frac{\boldsymbol{\beta} \cdot \boldsymbol{\alpha}}{\gamma \alpha^2} \hat{x}_{3,p}' \hat{x}_{3,q}' + \frac{1}{\alpha} \hat{x}_{1,p}' \hat{x}_{2,q}' \right) \hat{x}_{2,r}' \\
&\quad + \left( -\frac{1}{\alpha} \hat{x}_{1,p}' \hat{x}_{3,q}' + \frac{\boldsymbol{\beta} \cdot \boldsymbol{\alpha}}{\gamma \alpha^2} \hat{x}_{2,p}' \hat{x}_{3,q}' \right) \hat{x}_{3,r}' \\
&= \frac{1}{\alpha} \left\{ \delta_{pq} \hat{x}_{1,r}' - \hat{x}_{1,p}' \left( \hat{x}_{1,q}' \hat{x}_{1,r}' + \hat{x}_{2,q}' \hat{x}_{2,r}' + \hat{x}_{3,q}' \hat{x}_{3,r}' \right) \right\} \\
&\quad + \frac{\boldsymbol{\beta} \cdot \boldsymbol{\alpha}}{\gamma \alpha^2} \hat{x}_{3,q}' \left( \hat{x}_{2,p}' \hat{x}_{3,r}' - \hat{x}_{3,p}' \hat{x}_{2,r}' \right)
\end{aligned} \tag{S4.3}$$

Recall eqn. S3.17 after a cyclic change of indexes

$$\hat{x}_{2,p}' \hat{x}_{3,r}' - \hat{x}_{3,p}' \hat{x}_{2,r}' = \hat{x}_{1,t}' \varepsilon_{prt} \tag{S4.4}$$

After substituting eqns. S3.13 and S4.4 into eqn. S4.3,  $\mathbf{A}_{pr}^{\alpha_q}$  becomes

$$\mathbf{A}_{pr}^{\alpha_q} = \frac{1}{\alpha} \left( \delta_{pq} \hat{x}_{1,r}' - \hat{x}_{1,p}' \delta_{qr} \right) + \frac{\boldsymbol{\beta} \cdot \boldsymbol{\alpha}}{\gamma \alpha^2} \hat{x}_{3,q}' \hat{x}_{1,t}' \varepsilon_{prt} \tag{S4.5}$$

The antisymmetry property between the  $p$  and  $r$  indexes in the first term of eqn. S4.5 can be expressed by noting that

$$\begin{aligned}
\delta_{pq}\hat{x}_{1,r}' - \hat{x}_{1,p}'\delta_{qr} &= \hat{x}_{1,s}'(\delta_{pq}\delta_{rs} - \delta_{ps}\delta_{rq}) \\
&= \hat{x}_{1,s}'\varepsilon_{qst}\varepsilon_{prt} \\
&= (\hat{x}_q \times \hat{x}_1)'_t \varepsilon_{prt}
\end{aligned} \tag{S4.6}$$

where  $\hat{x}_{q,p} = \delta_{pq}$  is a global frame basis vector. Inserting this result into S4.5 gives

$$\mathbf{A}_{pr}^{\alpha_q} = \left( \frac{1}{\alpha} (\hat{x}_q \times \hat{x}_1)'_t + \frac{\boldsymbol{\beta} \cdot \boldsymbol{\alpha}}{\gamma \alpha^2} \hat{x}_{3,q}' \hat{x}_{1,t}' \right) \varepsilon_{prt} \tag{S4.7}$$

It is evident from eqn. S4.7 that  $\mathbf{A}_{pr}^{\alpha_q}$  is antisymmetric with respect to  $p$  and  $r$  from the antisymmetric Levi-Cita symbol  $\varepsilon_{prt}$ , i.e.  $\mathbf{A}_{rp}^{\alpha_q} = -\mathbf{A}_{pr}^{\alpha_q}$ .  $\mathbf{A}_{pr}^{\alpha_q}$  can be expressed back in terms of the  $\boldsymbol{\alpha}$  and  $\boldsymbol{\beta}$  vectors by recalling the definitions of  $\hat{x}_i'$  in eqn. S3.2 and expressing this result as

$$\begin{aligned}
\hat{x}_{1,p}' &= \frac{\alpha_p}{\alpha} \\
\hat{x}_{2,p}' &= \frac{1}{\gamma} \left( \beta_p - \frac{\boldsymbol{\alpha} \cdot \boldsymbol{\beta}}{\alpha^2} \alpha_p \right) \\
\hat{x}_{3,p}' &= \frac{1}{\alpha \gamma} (\boldsymbol{\alpha} \times \boldsymbol{\beta})_p
\end{aligned} \tag{S4.8}$$

Substituting eqn. S4.8 into eqn. S4.7 results in

$$\mathbf{A}_{pr}^{\alpha_q} = \left( \frac{1}{\alpha^2} (\hat{x}_q \times \boldsymbol{\alpha})_t + \frac{\boldsymbol{\beta} \cdot \boldsymbol{\alpha}}{\gamma^2 \alpha^4} (\boldsymbol{\alpha} \times \boldsymbol{\beta})_q \alpha_t \right) \varepsilon_{prt} \tag{S4.9}$$

Finally,  $\gamma^2$  can be expressed in terms of  $\boldsymbol{\alpha}$  and  $\boldsymbol{\beta}$  by

$$\gamma^2 = \beta^2 - \frac{(\boldsymbol{\beta} \cdot \boldsymbol{\alpha})^2}{\alpha^2} \tag{S4.10}$$

Inserting this result into eqn. S4.9 gives

$$\mathbf{A}_{pr}^{\alpha_q} = \left( \frac{1}{\alpha^2} (\hat{x}_q \times \boldsymbol{\alpha})_t + \frac{\boldsymbol{\alpha} \cdot \boldsymbol{\beta}}{\alpha^2 [\alpha^2 \beta^2 - (\boldsymbol{\alpha} \cdot \boldsymbol{\beta})^2]} (\boldsymbol{\alpha} \times \boldsymbol{\beta})_q \alpha_t \right) \varepsilon_{prt} \tag{S4.11}$$

The result for  $\mathbf{A}_{pr}^{\beta_q}$  can be found by inserting eqns. S3.7, S3.14, and S3.19 into eqn. S4.2 to give

$$\mathbf{A}_{pr}^{\beta_q} = \frac{1}{\gamma} \hat{x}_{3,q}' (\hat{x}_{3,p}' \hat{x}_{2,r}' - \hat{x}_{2,p}' \hat{x}_{3,r}') \tag{S4.12}$$

Now apply eqn. S4.4 to eqn. S4.12 to get

$$\mathbf{A}_{pr}^{\beta_q} = -\frac{1}{\gamma} \hat{x}_{3,q}' \hat{x}_{1,t}' \varepsilon_{prt} \tag{S4.13}$$

$\mathbf{A}_{pr}^{\beta_q}$  can be expressed in terms of the vectors  $\boldsymbol{\alpha}$  and  $\boldsymbol{\beta}$  by inserting eqns. S4.8 and S4.10 into eqn.

S4.13



$$\mathbf{A}_{pr}^{\beta_q} = -\frac{(\mathbf{a} \times \boldsymbol{\beta})_q \alpha_t \varepsilon_{prt}}{\alpha^2 \beta^2 - (\mathbf{a} \cdot \boldsymbol{\beta})^2} \quad (\text{S4.14})$$

### S5) Expression of $\mathbf{A}_{pr}^{\alpha_q}$ and $\mathbf{A}_{pr}^{\beta_q}$ in terms of infinitesimal rotation matrices

Recall the definitions for the infinitesimal rotation matrices from eqn. 28 of the main text

$$\mathbf{M}_1 \equiv \begin{pmatrix} 0 & 0 & 0 \\ 0 & 0 & -1 \\ 0 & 1 & 0 \end{pmatrix}, \quad \mathbf{M}_2 \equiv \begin{pmatrix} 0 & 0 & 1 \\ 0 & 0 & 0 \\ -1 & 0 & 0 \end{pmatrix}, \quad \mathbf{M}_3 \equiv \begin{pmatrix} 0 & -1 & 0 \\ 1 & 0 & 0 \\ 0 & 0 & 0 \end{pmatrix}. \quad (\text{S5.1})$$

The matrix elements of  $\mathbf{M}_t$  ( $t = 1, 2, 3$ ) can be conveniently expressed in terms of the Levi-Civita antisymmetric symbol by

$$\mathbf{M}_{t,pr} = -\varepsilon_{prt} \quad (\text{S5.2})$$

Therefore, the antisymmetric rotation derivative matrix  $\mathbf{A}_{pr}^{\alpha_q}$  in eqn. S4.11 can be expressed in terms of  $\mathbf{M}_t$  by

$$\mathbf{A}_{pr}^{\alpha_q} = -\left( \frac{1}{\alpha^2} (\hat{x}_q \times \mathbf{a})_t + \frac{\mathbf{a} \cdot \boldsymbol{\beta}}{\alpha^2 [\alpha^2 \beta^2 - (\mathbf{a} \cdot \boldsymbol{\beta})^2]} (\mathbf{a} \times \boldsymbol{\beta})_q \alpha_t \right) \mathbf{M}_{t,pr} \quad (\text{S5.3})$$

or in matrix form

$$\mathbf{A}^{\alpha_q} = \sum_t X_t^{\alpha_q} \mathbf{M}_t \quad (\text{S5.4})$$

where

$$X_t^{\alpha_q} \equiv -\left( \frac{1}{\alpha^2} (\hat{x}_q \times \mathbf{a})_t + \frac{\mathbf{a} \cdot \boldsymbol{\beta}}{\alpha^2 [\alpha^2 \beta^2 - (\mathbf{a} \cdot \boldsymbol{\beta})^2]} (\mathbf{a} \times \boldsymbol{\beta})_q \alpha_t \right) \quad (\text{S5.5})$$

Similarly  $\mathbf{A}^{\beta_q}$  can be expressed in terms of  $\mathbf{M}_t$  by

$$\mathbf{A}^{\beta_q} = \sum_t X_t^{\beta_q} \mathbf{M}_t \quad (\text{S5.6})$$

where

$$X_t^{\beta_q} \equiv \frac{(\mathbf{a} \times \boldsymbol{\beta})_q \alpha_t}{\alpha^2 \beta^2 - (\mathbf{a} \cdot \boldsymbol{\beta})^2} \quad (\text{S5.7})$$

Thus, the final Cartesian derivative matrixes with respect to atomic position  $(\partial \mathbf{R}_a / \partial \mathbf{r}_{a',q}) \mathbf{R}_a^{-1}$  ( $a' = a, N1, N2$ ;  $q = 1, 2, 3$  for  $x, y, z$ ) are given by inserting eqns. S5.4 and S5.6 into eqn. S3.4

$$\begin{array}{l}
\frac{\partial \mathbf{R}}{\partial \mathbf{r}_{N1,q}} \mathbf{R}^{-1} = \mathbf{A}^{\alpha_q} = \sum_t X_t^{N1,q} \mathbf{M}_t \\
\frac{\partial \mathbf{R}}{\partial \mathbf{r}_{N2,q}} \mathbf{R}^{-1} = \mathbf{A}^{\beta_q} = \sum_t X_t^{N2,q} \mathbf{M}_t \\
\frac{\partial \mathbf{R}}{\partial \mathbf{r}_{a,q}} \mathbf{R}^{-1} = -(\mathbf{A}^{\alpha_q} + \mathbf{A}^{\beta_q}) = \sum_t X_t^{a,q} \mathbf{M}_t
\end{array} \tag{S3.8}$$

where  $X_t^{N1,q} \equiv X_t^{\alpha_q}$ ,  $X_t^{N2,q} \equiv X_t^{\beta_q}$ , and  $X_t^{a,q} \equiv -(X_t^{\alpha_q} + X_t^{\beta_q})$ .

### S6) Wigner Function Derivatives $\partial D^l_{m'm}/\partial \Omega$ and Infinitesimal Rotation Matrices

Recall the expressions for  $\partial D^l_{m'm}/\partial \Omega$  from eqns. 22 and 24 of the main text

$$\frac{\partial}{\partial \Omega} D^l_{m',m}[\mathbf{R}(\Omega)] = \sum_{i=-1}^1 \sum_{k=-1}^1 B_{l-1,m'-i}^k C_{lm}^i D_{ki}^1[\mathbf{R}^{-1} \frac{\partial \mathbf{R}}{\partial \Omega}] D^l_{m',m-i+k}[\mathbf{R}]. \tag{22}$$

$$\frac{\partial}{\partial \Omega} D^l_{m'm}[\mathbf{R}(\Omega)] = \sum_{i=-1}^1 \sum_{k=-1}^1 B_{l-1,m'-i}^k C_{lm'}^i D_{ik}^1[\frac{\partial \mathbf{R}}{\partial \Omega} \mathbf{R}^{-1}] D^l_{m'-i+k,m}[\mathbf{R}]. \tag{24}$$

where the constants  $B_{lm}^k$  and  $C_{lm}^k$  are defined in eqns. A.8 and A.10 of the appendix, respectively.

$$B_{lm}^{\pm 1} \equiv \sqrt{\frac{(l \pm m + 1)(l \pm m + 2)}{2(2l+1)(2l+3)}}, \quad B_{lm}^0 \equiv \sqrt{\frac{(l+m+1)(l-m+1)}{(2l+1)(2l+3)}}. \tag{A.8}$$

$$C_{lm}^{\pm 1} \equiv \sqrt{\frac{2l+1}{2l-1}} \sqrt{\frac{(l \pm m)(l \pm m - 1)}{2}}, \quad C_{lm}^0 \equiv \sqrt{\frac{2l+1}{2l-1}} \sqrt{(l+m)(l-m)}. \tag{A.10}$$

As a first step in the calculation of  $\partial D^l_{m'm}/\partial \Omega$ , either  $\mathbf{A}^\Omega \equiv (\partial \mathbf{R}/\partial \Omega) \mathbf{R}^{-1}$  or  $\bar{\mathbf{A}}^\Omega \equiv \mathbf{R}^{-1} (\partial \mathbf{R}/\partial \Omega)$  is inserted into eqns. A.14 – A.16 in order to arrive at the expressions for  $D^1[\mathbf{A}^\Omega]$  and  $D^1[\bar{\mathbf{A}}^\Omega]$ , respectively. For many cases of  $\Omega$  (e.g.  $\Omega$  is an Euler angles, atomic position),  $\mathbf{A}^\Omega$  and  $\bar{\mathbf{A}}^\Omega$  are antisymmetric (see section S1). If  $\mathbf{A}^\Omega$  is antisymmetric, then  $\mathbf{A}^\Omega$  can be expanded in the basis of infinitesimal rotation matrices  $\mathbf{M}_p$  (eqn. S1.4)  $\mathbf{A}^\Omega = \sum_{p=1}^3 a_p \mathbf{M}_p$ . Since the  $D^1[\mathbf{R}]$  is a linear function of  $\mathbf{R}$  from eqns. A.14 – A.16,

$$D^1[\mathbf{A}^\Omega] = \sum_{p=1}^3 a_p D^1[\mathbf{M}_p] \tag{S6.1}$$

and the expression for  $\partial D^l_{m'm}/\partial \Omega$  from eqn. 24 is given by

$$\begin{aligned}\frac{\partial}{\partial \Omega} D_{m'm}^l[\mathbf{R}(\Omega)] &= \sum_{p=1}^3 a_p \sum_{i=-1}^1 \sum_{k=-1}^1 B_{l-1, m'-i}^k C_{lm'}^i D_{ik}^1[\mathbf{M}_p] D_{m'-i+k, m}^l[\mathbf{R}] \\ &= \sum_{p=1}^3 a_p \left( \frac{\partial D_{m'm}^l[\mathbf{R}]}{\partial \Phi} \right)_{\hat{x}_p}\end{aligned}\quad (\text{S6.2})$$

where  $(\partial D_{m'm}^l / \partial \Phi)_{\hat{x}_p}$  is the derivative of  $D_{m'm}^l$  with respect to rotation about the  $\hat{x}_p$  coordinate axis defined by

$$\left( \frac{\partial D_{m'm}^l[\mathbf{R}]}{\partial \Phi} \right)_{\hat{x}_p} \equiv \sum_{i=-1}^1 \sum_{k=-1}^1 B_{l-1, m'-i}^k C_{lm'}^i D_{ik}^1[\mathbf{M}_p] D_{m'-i+k, m}^l[\mathbf{R}] \quad (\text{S6.3})$$

A similar result holds by inserting  $\bar{\mathbf{A}}^\Omega \equiv \mathbf{R}^{-1}(\partial \mathbf{R} / \partial \Omega)$  into eqn. 22.

The infinitesimal rotation matrix derivatives of Wigner functions  $(\partial D_{m'm}^l / \partial \Phi)_{\hat{x}_p}$  defined in eqn. S6.3 will be derived as follows. First the results for  $D^l[\mathbf{M}_p]$  are found by inserting  $\mathbf{M}_p$  given in eqn. 28 into eqns. A14 – A16 to arrive at

$$D^l[\mathbf{M}_1] = \frac{-i}{\sqrt{2}} \begin{pmatrix} 0 & 1 & 0 \\ 1 & 0 & 1 \\ 0 & 1 & 0 \end{pmatrix}, \quad D^l[\mathbf{M}_2] = \frac{1}{\sqrt{2}} \begin{pmatrix} 0 & 1 & 0 \\ -1 & 0 & 1 \\ 0 & -1 & 0 \end{pmatrix}, \quad D^l[\mathbf{M}_3] = i \begin{pmatrix} 1 & 0 & 0 \\ 0 & 0 & 0 \\ 0 & 0 & -1 \end{pmatrix}. \quad (\text{S6.4})$$

In component form,  $D^l[\mathbf{M}_p]$  appears as

$$D_{ik}^l[\mathbf{M}_1] = \frac{-i}{\sqrt{2}} (\delta_{i,-1} \delta_{k,0} + \delta_{i,0} \delta_{k,-1} + \delta_{i,0} \delta_{k,1} + \delta_{i,1} \delta_{k,0}) \quad (\text{S6.5})$$

$$D_{ik}^l[\mathbf{M}_2] = \frac{1}{\sqrt{2}} (\delta_{i,-1} \delta_{k,0} - \delta_{i,0} \delta_{k,-1} + \delta_{i,0} \delta_{k,1} - \delta_{i,1} \delta_{k,0}) \quad (\text{S6.6})$$

$$D_{ik}^l[\mathbf{M}_3] = i (\delta_{k,-1} \delta_{i,-1} - \delta_{k,1} \delta_{i,1}) \quad (\text{S6.7})$$

After inserting eqns. S6.5 – S6.7,  $B_{lm}^k$  (eqn. A.8), and  $C_{lm}^k$  (eqn. A.10) into eqn. S6.3, the results for  $(\partial D_{m'm}^l / \partial \Phi)_{\hat{x}_p}$  are given by

$$\left( \frac{\partial D_{m'm}^l[\mathbf{R}]}{\partial \Phi} \right)_{\hat{x}_1} = \frac{-i}{2} (K_{lm}^- D_{m'-1, m}^l[\mathbf{R}] + K_{lm}^+ D_{m'+1, m}^l[\mathbf{R}]) \quad (\text{S6.8})$$

$$\left( \frac{\partial D_{m'm}^l[\mathbf{R}]}{\partial \Phi} \right)_{\hat{x}_2} = -\frac{1}{2} (K_{lm}^- D_{m'-1, m}^l[\mathbf{R}] - K_{lm}^+ D_{m'+1, m}^l[\mathbf{R}]) \quad (\text{S6.9})$$

$$\left( \frac{\partial D_{m'm}^l[\mathbf{R}]}{\partial \Phi} \right)_{\hat{x}_3} = -im' D_{m'm}^l[\mathbf{R}] \quad (\text{S6.10})$$

where  $K_{lm}^\pm \equiv \sqrt{(l \pm m + 1)(l \mp m)}$ . If  $\mathbf{R}$  is set equal to the identity matrix  $\mathbf{I}$ ,  $D_{m',m}^l[\mathbf{I}] = \delta_{m'm}$ , and eqns.

S6.8 – S6.10 become

$$\left( \frac{\partial D_{m'm}^l[\mathbf{I}]}{\partial \Phi} \right)_{\hat{x}_1} = \frac{-i}{2} (K_{lm}^- \delta_{m',m-1} + K_{lm}^+ \delta_{m',m+1}) \quad (\text{S6.11})$$

$$\left( \frac{\partial D_{m'm}^l[\mathbf{I}]}{\partial \Phi} \right)_{\hat{x}_2} = \frac{1}{2} (K_{lm}^- \delta_{m',m-1} - K_{lm}^+ \delta_{m',m+1}) \quad (\text{S6.12})$$

$$\left( \frac{\partial D_{m'm}^l[\mathbf{I}]}{\partial \Phi} \right)_{\hat{x}_3} = -im \delta_{m',m} \quad (\text{S6.13})$$

where  $K_{lm\pm 1}^\mp = K_{lm}^\pm$  was used. Eqns. S6.11 – S6.13 agree with eqns. 5 – 7, respectively on page 116 of Varshalovich et al.<sup>53</sup>

The expressions for  $(\partial D_{m'm}^l / \partial \Phi)_{\hat{x}_p}$  given in eqns. S6.8 – S6.10 can be used to find derivatives of spherical tensors  $T_{lm}$  with respect to an infinitesimal rotation. Suppose  $T_{lm}(\hat{r})$  transforms to  $T_{lm}(\hat{r}')$  under a rotation  $\mathbf{R}$  where  $\hat{r}' = \mathbf{R}\hat{r}$ , i.e.

$$T_{lm}(\hat{r}') = \sum_{m'=-l}^l D_{m'm}^l[\mathbf{R}^{-1}] T_{lm'}(\hat{r}). \quad (\text{S6.14})$$

The derivative of  $T_{lm}' \equiv T_{lm}(\hat{r}')$  with respect to an infinitesimal rotation about the  $\hat{x}_p$  axis is given by

$$\left( \frac{\partial T_{lm}'}{\partial \Phi} \right)_{\hat{x}_p} = \sum_{m'=-l}^l T_{lm'}(\hat{r}) \left( \frac{\partial D_{mm'}^l[\mathbf{R}]}{\partial \Phi} \right)_{\hat{x}_p}^*. \quad (\text{S6.15})$$

For  $p = 1, 2, 3$ ,  $(\partial T_{lm}' / \partial \Phi)_{\hat{x}_p}$  is found by inserting eqns. S6.8 – S6.10 into eqn. S6.15

$$\left( \frac{\partial T_{lm}'}{\partial \Phi} \right)_{\hat{x}_1} = \frac{i}{2} (K_{lm}^- T_{lm-1}' + K_{lm}^+ T_{lm+1}'), \quad (\text{S6.16})$$

$$\left( \frac{\partial T_{lm}'}{\partial \Phi} \right)_{\hat{x}_2} = -\frac{1}{2} (K_{lm}^- T_{lm-1}' - K_{lm}^+ T_{lm+1}'), \quad (\text{S6.17})$$

$$\left( \frac{\partial T_{lm}'}{\partial \Phi} \right)_{\hat{x}_3} = im T_{lm}'. \quad (\text{S6.18})$$

The expressions for torque in eqns. 31 – 33 of the main text can be found by letting  $T_{lm} = Q_{lm}$  be the multipole moment and inserting eqns. S6.16 – S6.18 into eqn. 25.

## S7) Wigner Matrix Derivatives for Euler Angles

In this section,  $\partial D_{m'm}^l / \partial \Omega$  is derived for the case when  $\Omega$  is an Euler angle using the expressions given in eqns. 22 and 24 of the main text by first calculating  $\mathbf{R}^{-1}(\partial \mathbf{R} / \partial \Omega)$  or  $(\partial \mathbf{R} / \partial \Omega) \mathbf{R}^{-1}$ , respectively.

The Cartesian rotation matrix as a function of Euler angles<sup>53-56</sup>  $\mathbf{R}(\alpha, \beta, \gamma)$  is formed from the product three successive rotations. First, the  $\hat{x}_i$  coordinate system is rotated about the  $\hat{x}_3$  axis by an angle  $\alpha$  to arrive at the  $\hat{x}_i'$  coordinate system, i.e.  $\hat{x}_k' = \sum_j \mathbf{R}_{jk}(\alpha \hat{x}_3) \hat{x}_j'$ . Next, the  $\hat{x}_i'$  coordinate system is rotated about the  $\hat{x}_2'$  axis by an angle  $\beta$  to arrive at the  $\hat{x}_i''$  coordinate system, i.e.

$\hat{x}_l'' = \sum_k \mathbf{R}_{kl}(\beta \hat{x}_2') \hat{x}_k'$ . Lastly, the  $\hat{x}_i''$  coordinate system is rotated about the  $\hat{x}_3''$  axis by an angle  $\gamma$  to arrive at the  $\hat{x}_i'''$  coordinate system, i.e.  $\hat{x}_i''' = \sum_l \mathbf{R}_{li}(\gamma \hat{x}_3'') \hat{x}_l''$ . The total transformation is given by  $\hat{x}_i''' = \sum_j \mathbf{R}_{ji}(\alpha, \beta, \gamma) \hat{x}_j$ , where  $\mathbf{R}_{ji}(\alpha, \beta, \gamma) \equiv \sum_{lk} \mathbf{R}_{kj}(\alpha \hat{x}_3) \mathbf{R}_{kl}(\beta \hat{x}_2') \mathbf{R}_{li}(\gamma \hat{x}_3'')$ . In matrix form,  $\mathbf{R}(\alpha, \beta, \gamma)$  is given by

$$\mathbf{R}(\alpha, \beta, \gamma) = \begin{pmatrix} \cos \alpha & -\sin \alpha & 0 \\ \sin \alpha & \cos \alpha & 0 \\ 0 & 0 & 1 \end{pmatrix} \begin{pmatrix} \cos \beta & 0 & \sin \beta \\ 0 & 1 & 0 \\ -\sin \beta & 0 & \cos \beta \end{pmatrix} \begin{pmatrix} \cos \gamma & -\sin \gamma & 0 \\ \sin \gamma & \cos \gamma & 0 \\ 0 & 0 & 1 \end{pmatrix} \quad (\text{S7.1})$$

$$= \begin{pmatrix} \cos \alpha \cos \beta \cos \gamma - \sin \alpha \sin \gamma & -\cos \alpha \cos \beta \sin \gamma - \sin \alpha \cos \gamma & \cos \alpha \sin \beta \\ \sin \alpha \cos \beta \cos \gamma + \cos \alpha \sin \gamma & -\sin \alpha \cos \beta \sin \gamma + \cos \alpha \cos \gamma & \sin \alpha \sin \beta \\ -\sin \beta \cos \gamma & \sin \beta \sin \gamma & \cos \beta \end{pmatrix}.$$

Symbolically, eqn. S7.1 can be expressed as

$$\mathbf{R}(\alpha, \beta, \gamma) = \mathbf{R}_z(\alpha) \mathbf{R}_y(\beta) \mathbf{R}_z(\gamma) \quad (\text{S7.2})$$

The inverse of  $\mathbf{R}(\alpha, \beta, \gamma)$  is given by

$$\mathbf{R}^{-1}(\alpha, \beta, \gamma) = \mathbf{R}(-\gamma, -\beta, -\alpha) = \mathbf{R}_z(-\gamma) \mathbf{R}_y(-\beta) \mathbf{R}_z(-\alpha). \quad (\text{S7.3})$$

The expression for  $(\partial \mathbf{R} / \partial \alpha) \mathbf{R}^{-1}$  is given by

$$\frac{\partial \mathbf{R}}{\partial \alpha} \mathbf{R}^{-1} = \frac{\partial \mathbf{R}_z(\alpha)}{\partial \alpha} \mathbf{R}_z(-\alpha) = \begin{pmatrix} 0 & -1 & 0 \\ 1 & 0 & 0 \\ 0 & 0 & 0 \end{pmatrix} = \mathbf{M}_3. \quad (\text{S7.4})$$

Similarly, the results for  $\mathbf{R}^{-1}(\partial \mathbf{R} / \partial \beta)$  and  $\mathbf{R}^{-1}(\partial \mathbf{R} / \partial \gamma)$  are given by

$$\mathbf{R}^{-1} \frac{\partial \mathbf{R}}{\partial \beta} = \sin \gamma \mathbf{M}_1 + \cos \gamma \mathbf{M}_2 \quad (\text{S7.5})$$

$$\mathbf{R}^{-1} \frac{\partial \mathbf{R}}{\partial \gamma} = \mathbf{M}_3 \quad (\text{S7.6})$$

After inserting eqn. S7.4 into eqn. S6.2 or eqn. 24,  $\partial D_{m'm}^l / \partial \alpha$  is given by

$$\frac{\partial D_{m',m}^l}{\partial \alpha} = \left( \frac{\partial D_{m',m}^l}{\partial \Phi} \right)_{\hat{x}_1} = -im' D_{m',m}^l \quad (\text{S7.10})$$

Similarly, after inserting eqns. S7.5 and S7.6 into eqn. 22, the results for  $\partial D_{m',m}^l / \partial \beta$  and  $\partial D_{m',m}^l / \partial \gamma$  are given by

$$\frac{\partial D_{m',m}^l}{\partial \beta} = \frac{e^{-i\gamma}}{2} \sqrt{(l+m)(l-m+1)} D_{m',m-1}^l - \frac{e^{i\gamma}}{2} \sqrt{(l-m)(l+m+1)} D_{m',m+1}^l. \quad (\text{S7.11})$$

$$\frac{\partial D_{m',m}^l}{\partial \gamma} = -im D_{m',m}^l \quad (\text{S7.12})$$

A second equation for  $\partial D_{m',m}^l / \partial \beta$  can be found by taking the complex conjugate of eqn. S7.11, interchanging  $m'$  with  $m$ , and interchanging  $\mathbf{R}$  with  $\mathbf{R}^{-1}$  (see eqn. S7.3)

$$\frac{\partial D_{m',m}^l}{\partial \beta} = -\frac{e^{-i\alpha}}{2} \sqrt{(l+m')(l-m'+1)} D_{m'-1,m}^l + \frac{e^{i\alpha}}{2} \sqrt{(l-m')(l+m'+1)} D_{m'+1,m}^l. \quad (\text{S7.13})$$

Eqns. S7.10 – S7.13 agree with eqns. 8, 3, 9, and 2, respectively on page 94 of Varshalovich et al.<sup>53</sup>

## S8) Wigner Matrix Derivatives for Quaternions

In this section, derivatives of Wigner rotation matrices with respect to quaternions  $\partial D_{m',m}^l / \partial q_\mu$  are derived. Expressions for  $(\partial \mathbf{R} / \partial q_\mu) \mathbf{R}^{-1}$  are found and then inserted into eqn. 24 to arrive a set of equations for  $\partial D_{m',m}^l / \partial q_\mu$ . The Cartesian rotation matrix  $\mathbf{R}$  can be parameterized explicitly<sup>55</sup> in terms of quaternions  $q_\mu \equiv (q_0, q_1, q_2, q_3)$  by

$$\mathbf{R} = \begin{pmatrix} q_0^2 + q_1^2 - q_2^2 - q_3^2 & 2(q_1 q_2 - q_0 q_3) & 2(q_1 q_3 + q_0 q_2) \\ 2(q_1 q_2 + q_0 q_3) & q_0^2 - q_1^2 + q_2^2 - q_3^2 & 2(q_2 q_3 - q_0 q_1) \\ 2(q_1 q_3 - q_0 q_2) & 2(q_2 q_3 + q_0 q_1) & q_0^2 - q_1^2 - q_2^2 + q_3^2 \end{pmatrix}. \quad (\text{S8.1})$$

The inverse matrix is given by letting  $(q_0, q_1, q_2, q_3) \rightarrow (q_0, -q_1, -q_2, -q_3)$

$$\mathbf{R}^{-1}(q_0, q_1, q_2, q_3) = \mathbf{R}(q_0, -q_1, -q_2, -q_3). \quad (\text{S8.2})$$

and the quaternions satisfy a normalization condition

$$\sum_{\mu=0}^3 q_\mu^2 = 1. \quad (\text{S8.3})$$

Since quaternions satisfy a constraint condition,  $(\partial \mathbf{R} / \partial q_\mu) \mathbf{R}^{-1}$  is not antisymmetric. Nevertheless,  $(\partial \mathbf{R} / \partial q_\mu) \mathbf{R}^{-1}$  can still be calculated and inserted into eqn. 24 to arrive  $\partial D_{m',m}^l / \partial q_\mu$ .

In order to calculate  $(\partial \mathbf{R} / \partial q_\mu) \mathbf{R}^{-1}$ , one could simply differentiate eqn. S8.1 with respect to  $q_\mu$  to get  $\partial \mathbf{R} / \partial q_\mu$ , and then right multiply by  $\mathbf{R}^{-1}$ . The result would be an expression which involves cubic

powers of  $q_\mu$ . This expression could be simplified by the normalization condition, eqn. S8.3, into an expression which is linear in  $q_\mu$ .

However, a more economical derivation of  $(\partial\mathbf{R}/\partial q_\mu)\mathbf{R}^{-1}$  can be found by first noting the quaternion multiplication formulae for successive rotations. First, note that quaternions can be expressed in vector notation by  $q_\mu \equiv (q_0, q_1, q_2, q_3) \equiv (q_0, \vec{q})$ . Suppose  $q_\mu, p_\mu$ , and  $r_\mu$  are three different quaternions related by

$$\mathbf{R}(q_\mu)\mathbf{R}(p_\mu) = \mathbf{R}(r_\mu) . \quad (\text{S8.4})$$

It can be shown<sup>55</sup> that  $r \equiv q * p$  is given by  $r_0 = p_0 q_0 - \vec{p} \cdot \vec{q}$ , and  $\vec{r} = p_0 \vec{q} + q_0 \vec{p} + \vec{p} \times \vec{q}$ . In component form, this appears as

$$r_0 = q_0 p_0 - \sum_{i=1}^3 q_i p_i , \quad r_i = q_0 p_i + p_0 q_i + \sum_{j=1}^3 \sum_{k=1}^3 q_j p_k \varepsilon_{ijk} \quad i = 1, 2, 3, \quad (\text{S8.5})$$

where  $\varepsilon_{ijk}$  is the Levi-Cita symbol defined by 1 for an even permutation of (1,2,3), -1 for an odd permutation of (1,2,3), and 0 if any index is repeated. Recall the inverse relation for quaternions in eqn. S8.2. The expression  $(\partial\mathbf{R}/\partial q_\mu)\mathbf{R}^{-1}$  can be derived from eqns. S8.1 and S8.2 by noting

$$\begin{aligned} \frac{\partial\mathbf{R}(q)}{\partial q_\mu} \mathbf{R}^{-1}(q) &= \lim_{p \rightarrow q^{-1}} \frac{\partial}{\partial q_\mu} \mathbf{R}(q)\mathbf{R}(p) = \lim_{p \rightarrow q^{-1}} \frac{\partial}{\partial q_\mu} \mathbf{R}(r) \\ &= \lim_{p \rightarrow q^{-1}} \sum_{v=0}^3 \frac{\partial\mathbf{R}(r)}{\partial r_v} \frac{\partial r_v}{\partial q_\mu} \end{aligned} \quad (\text{S8.6})$$

where the limit of  $p \rightarrow q^{-1}$  is short for  $(p_0, p_1, p_2, p_3) \rightarrow (q_0, -q_1, -q_2, -q_3)$ . The following expressions for  $r_v$  and  $\partial r_v / \partial q_\mu$  can be found from eqn. S8.5. It is important to first evaluate the derivative and then apply the limit.

$$\lim_{p \rightarrow q^{-1}} r_0 = 1, \quad \lim_{p \rightarrow q^{-1}} r_i = 0, \quad (\text{S8.7})$$

$$\lim_{p \rightarrow q^{-1}} \frac{\partial r_0}{\partial q_0} = q_0, \quad \lim_{p \rightarrow q^{-1}} \frac{\partial r_0}{\partial q_i} = q_i, \quad (\text{S8.8})$$

$$\lim_{p \rightarrow q^{-1}} \frac{\partial r_i}{\partial q_0} = -q_i, \quad \lim_{p \rightarrow q^{-1}} \frac{\partial r_i}{\partial q_j} = q_0 \delta_{ij} + \sum_k \varepsilon_{ijk} q_k \quad (\text{S8.9})$$

where  $i, j = 1, 2, 3$ . The derivative of  $\mathbf{R}(r)$  with respect to  $r_0$  can be found by simply replacing the  $q$ 's with  $r$ 's in eqn. S8.1 and then differentiate with respect to  $r_0$ . After taking the limit of  $p \rightarrow q^{-1}$  and applying eqn. S8.7, the result becomes

$$\lim_{p \rightarrow q^{-1}} \frac{\partial\mathbf{R}(r)}{\partial r_0} = 2\mathbf{I} . \quad (\text{S8.10})$$

A similar procedure can be applied for the derivative  $\mathbf{R}(r)$  with respect to  $r_i$  ( $i = 1, 2, 3$ ) to yield the following result

$$\lim_{p \rightarrow q^{-1}} \frac{\partial \mathbf{R}(r)}{\partial r_i} = 2\mathbf{M}_i, \quad (\text{S8.11})$$

where  $\mathbf{M}_i$  are the infinitesimal rotation matrices. Eqns. S8.7 – S8.11 can be inserted into eqn. S8.6 to arrive at the result for  $(\partial \mathbf{R} / \partial q_\mu) \mathbf{R}^{-1}$

$$\frac{\partial \mathbf{R}}{\partial q_0} \mathbf{R}^{-1} = 2(q_0 \mathbf{I} - \sum_i q_i \mathbf{M}_i) \quad (\text{S8.12})$$

$$\frac{\partial \mathbf{R}}{\partial q_i} \mathbf{R}^{-1} = 2(q_i \mathbf{I} + q_0 \mathbf{M}_i - \sum_{jk} \varepsilon_{ijk} q_j \mathbf{M}_k) \quad (\text{S8.13})$$

Eqn. S8.13 can be written out explicitly for  $i = 1, 2, 3$  by

$$\frac{\partial \mathbf{R}}{\partial q_1} \mathbf{R}^{-1} = 2(q_1 \mathbf{I} + q_0 \mathbf{M}_1 + q_3 \mathbf{M}_2 - q_2 \mathbf{M}_3) \quad (\text{S8.14})$$

$$\frac{\partial \mathbf{R}}{\partial q_2} \mathbf{R}^{-1} = 2(q_2 \mathbf{I} + q_0 \mathbf{M}_2 + q_1 \mathbf{M}_3 - q_3 \mathbf{M}_1) \quad (\text{S8.15})$$

$$\frac{\partial \mathbf{R}}{\partial q_3} \mathbf{R}^{-1} = 2(q_3 \mathbf{I} + q_0 \mathbf{M}_3 + q_2 \mathbf{M}_1 - q_1 \mathbf{M}_2) \quad (\text{S8.16})$$

Note  $(\partial \mathbf{R} / \partial q_\mu) \mathbf{R}^{-1}$  is *not* antisymmetric due to the presence of the terms containing  $\mathbf{I}$ .

In order to arrive at the final expression for  $\partial D_{m'm}^l / \partial q_\mu$ , the following intermediate result is needed

$$\sum_{i=-1}^1 \sum_{k=-1}^1 B_{l-1, m'-i}^k C_{lm'}^i D_{ik}^l [\mathbf{I}] D_{m'-i+k, m}^l [\mathbf{R}] = l D_{m', m}^l [\mathbf{R}], \quad (\text{S8.17})$$

where  $\mathbf{I}$  is the identity matrix. After inserting eqns. S8.12 – S8.16 for  $(\partial \mathbf{R} / \partial q_\mu) \mathbf{R}^{-1}$  into eqn. 24 for  $\partial D_{m'm}^l / \partial q_\mu$ , and using eqns. S8.17, S6.8 – S6.10, the final results for  $\partial D_{m'm}^l / \partial q_\mu$  becomes

$$\frac{\partial D_{m'm}^l}{\partial q_0} = 2(q_0 l + im' q_3) D_{m'm}^l + (q_2 + iq_1) K_{lm'}^- D_{m'-1, m}^l + (-q_2 + iq_1) K_{lm'}^+ D_{m'+1, m}^l \quad (\text{S8.18})$$

$$\frac{\partial D_{m'm}^l}{\partial q_1} = 2(q_1 l + im' q_2) D_{m'm}^l + (-q_3 - iq_0) K_{lm'}^- D_{m'-1, m}^l + (q_3 - iq_0) K_{lm'}^+ D_{m'+1, m}^l \quad (\text{S8.19})$$

$$\frac{\partial D_{m'm}^l}{\partial q_2} = 2(q_2 l - im' q_1) D_{m'm}^l + (-q_0 + iq_3) K_{lm'}^- D_{m'-1, m}^l + (q_0 + iq_3) K_{lm'}^+ D_{m'+1, m}^l \quad (\text{S8.20})$$

$$\frac{\partial D_{m'm}^l}{\partial q_3} = 2(q_3 l - im' q_0) D_{m'm}^l + (q_1 - iq_2) K_{lm'}^- D_{m'-1, m}^l + (-q_1 - iq_2) K_{lm'}^+ D_{m'+1, m}^l \quad (\text{S8.21})$$

A second set of equations for  $\partial D_{m'm}^l / \partial q_\mu$  can be found by taking the complex conjugate of eqns. S8.18 – S8.21, interchanging  $m'$  with  $m$ , and interchanging  $\mathbf{R}$  with  $\mathbf{R}^{-1}$  (eqn. S8.2)



$$\frac{\partial D_{m'm}^l}{\partial q_0} = 2(q_0 l + imq_3)D_{m'm}^l + (-q_2 + iq_1)K_{lm}^- D_{m'm-1}^l + (q_2 + iq_1)K_{lm}^+ D_{m'm+1}^l \quad (\text{S8.22})$$

$$\frac{\partial D_{m'm}^l}{\partial q_1} = 2(q_1 l - imq_2)D_{m'm}^l + (-q_3 - iq_0)K_{lm}^- D_{m'm-1}^l + (q_3 - iq_0)K_{lm}^+ D_{m'm+1}^l \quad (\text{S8.23})$$

$$\frac{\partial D_{m'm}^l}{\partial q_2} = 2(q_2 l + imq_1)D_{m'm}^l + (q_0 - iq_3)K_{lm}^- D_{m'm-1}^l + (-q_0 - iq_3)K_{lm}^+ D_{m'm+1}^l \quad (\text{S8.24})$$

$$\frac{\partial D_{m'm}^l}{\partial q_3} = 2(q_3 l - imq_0)D_{m'm}^l + (q_1 + iq_2)K_{lm}^- D_{m'm-1}^l + (-q_1 + iq_2)K_{lm}^+ D_{m'm+1}^l. \quad (\text{S8.25})$$

Eqns. S8.22 – S8.25 could have also been derived by calculating  $\mathbf{R}^{-1}(\partial \mathbf{R}/\partial q_\mu)$  and inserting these results into eqn. 22.

### S9) Proof of $\boldsymbol{\tau}_a = \boldsymbol{\alpha} \times \mathbf{F}_{a \rightarrow N1}^{\text{orient}} + \boldsymbol{\beta} \times \mathbf{F}_{a \rightarrow N2}^{\text{orient}}$

The expressions for  $\mathbf{F}_{a \rightarrow N1}^{\text{orient}}$  and  $\mathbf{F}_{a \rightarrow N2}^{\text{orient}}$  are given by inserting eqn. 37 into eqn. 39

$$\begin{aligned} \mathbf{F}_{a \rightarrow N1, q}^{\text{orient}} &= - \left( \frac{1}{\boldsymbol{\alpha}^2} (\hat{\mathbf{x}}_q \times \boldsymbol{\alpha}) \cdot \boldsymbol{\tau}_a + \frac{\boldsymbol{\alpha} \cdot \boldsymbol{\beta}}{\boldsymbol{\alpha}^2 [\boldsymbol{\alpha}^2 \boldsymbol{\beta}^2 - (\boldsymbol{\alpha} \cdot \boldsymbol{\beta})^2]} (\boldsymbol{\alpha} \times \boldsymbol{\beta})_q \boldsymbol{\alpha} \cdot \boldsymbol{\tau}_a \right) \\ &= - \left( \frac{1}{\boldsymbol{\alpha}^2} \hat{\mathbf{x}}_q \cdot (\boldsymbol{\alpha} \times \boldsymbol{\tau}_a) + \frac{(\boldsymbol{\alpha} \cdot \boldsymbol{\beta})(\boldsymbol{\alpha} \cdot \boldsymbol{\tau}_a)}{\boldsymbol{\alpha}^2 [\boldsymbol{\alpha}^2 \boldsymbol{\beta}^2 - (\boldsymbol{\alpha} \cdot \boldsymbol{\beta})^2]} (\boldsymbol{\alpha} \times \boldsymbol{\beta})_q \right) \end{aligned} \quad (\text{S9.1})$$

or

$$\mathbf{F}_{a \rightarrow N1}^{\text{orient}} = - \left( \frac{1}{\boldsymbol{\alpha}^2} \boldsymbol{\alpha} \times \boldsymbol{\tau}_a + \frac{(\boldsymbol{\alpha} \cdot \boldsymbol{\beta})(\boldsymbol{\alpha} \cdot \boldsymbol{\tau}_a)}{\boldsymbol{\alpha}^2 [\boldsymbol{\alpha}^2 \boldsymbol{\beta}^2 - (\boldsymbol{\alpha} \cdot \boldsymbol{\beta})^2]} \boldsymbol{\alpha} \times \boldsymbol{\beta} \right) \quad (\text{S9.2})$$

Similarly,

$$\mathbf{F}_{a \rightarrow N2}^{\text{orient}} = \frac{\boldsymbol{\alpha} \cdot \boldsymbol{\tau}_a}{\boldsymbol{\alpha}^2 \boldsymbol{\beta}^2 - (\boldsymbol{\alpha} \cdot \boldsymbol{\beta})^2} \boldsymbol{\alpha} \times \boldsymbol{\beta} \quad (\text{S9.3})$$

Using the property  $\mathbf{A} \times (\mathbf{B} \times \mathbf{C}) = \mathbf{B}(\mathbf{A} \cdot \mathbf{C}) - \mathbf{C}(\mathbf{A} \cdot \mathbf{B})$ ,  $\boldsymbol{\alpha} \times \mathbf{F}_{a \rightarrow N1}^{\text{orient}}$  and  $\boldsymbol{\beta} \times \mathbf{F}_{a \rightarrow N2}^{\text{orient}}$  become

$$\boldsymbol{\alpha} \times \mathbf{F}_{a \rightarrow N1}^{\text{orient}} = - \left( \frac{1}{\boldsymbol{\alpha}^2} (\boldsymbol{\alpha}(\boldsymbol{\alpha} \cdot \boldsymbol{\tau}_a) - \boldsymbol{\tau}_a \boldsymbol{\alpha}^2) + \frac{(\boldsymbol{\alpha} \cdot \boldsymbol{\beta})(\boldsymbol{\alpha} \cdot \boldsymbol{\tau}_a)}{\boldsymbol{\alpha}^2 [\boldsymbol{\alpha}^2 \boldsymbol{\beta}^2 - (\boldsymbol{\alpha} \cdot \boldsymbol{\beta})^2]} (\boldsymbol{\alpha}(\boldsymbol{\alpha} \cdot \boldsymbol{\beta}) - \boldsymbol{\beta} \boldsymbol{\alpha}^2) \right) \quad (\text{S9.4})$$

$$\boldsymbol{\beta} \times \mathbf{F}_{a \rightarrow N2}^{\text{orient}} = \frac{\boldsymbol{\alpha} \cdot \boldsymbol{\tau}_a}{\boldsymbol{\alpha}^2 \boldsymbol{\beta}^2 - (\boldsymbol{\alpha} \cdot \boldsymbol{\beta})^2} (\boldsymbol{\alpha} \boldsymbol{\beta}^2 - \boldsymbol{\beta}(\boldsymbol{\alpha} \cdot \boldsymbol{\beta})) \quad (\text{S9.5})$$

Adding eqns. S9.4 and S9.5 gives the final result for  $\boldsymbol{\tau}_a$ .

$$\boldsymbol{\alpha} \times \mathbf{F}_{a \rightarrow N1}^{orient} + \boldsymbol{\beta} \times \mathbf{F}_{a \rightarrow N2}^{orient} = \frac{1}{\boldsymbol{\alpha}^2} (\boldsymbol{\tau}_a \boldsymbol{\alpha}^2 - \boldsymbol{\alpha} (\boldsymbol{\alpha} \cdot \boldsymbol{\tau}_a)) + \frac{(\boldsymbol{\alpha} \cdot \boldsymbol{\tau}_a)}{\boldsymbol{\alpha}^2} \boldsymbol{\alpha} = \boldsymbol{\tau}_a \quad (\text{S9.6})$$

### S10) Proof of $\sum_{a'} \mathbf{r}_{a'} \times \partial \eta / \partial \mathbf{r}_{a'} = 0$

The variable  $\eta$  denotes any bond length  $r$ , bond angle  $\theta$ , or torsion angle  $\omega$ . For all cases,  $\eta$  can be expressed as a function of a scalar product of relative atomic positions. For example, the bond length  $r_{ab}$  between two atoms  $a$  and  $b$  is given by

$$r_{ab} = \sqrt{\mathbf{r}_{ab} \cdot \mathbf{r}_{ab}} \quad (\text{S10.1})$$

where  $\mathbf{r}_{ab} \equiv \mathbf{r}_a - \mathbf{r}_b$  is the relative displacement between atoms  $a$  and  $b$ . Similarly, the bond angle  $\theta_{abc}$  between atoms  $a, b, c$  is given by

$$\theta_{abc} = \cos^{-1} \left( \frac{\mathbf{r}_{ab} \cdot \mathbf{r}_{cb}}{r_{ab} r_{cb}} \right) \quad (\text{S10.2})$$

and the torsion angle  $\omega_{abcd}$  between atoms  $a, b, c, d$  is given by

$$\omega_{abcd} = \cos^{-1} \left( \frac{\mathbf{r}_{ab} \cdot \mathbf{r}_{dc}}{r_{ab} r_{dc}} - \frac{(\mathbf{r}_{ab} \cdot \mathbf{r}_{cb})(\mathbf{r}_{dc} \cdot \mathbf{r}_{cb})}{r_{ab} r_{dc} r_{cb}^2} \right) \quad (\text{S10.3})$$

Thus, the generic variable  $\eta$  is a function of the dot product  $\mathbf{r}_{ab} \cdot \mathbf{r}_{cd}$ , i.e.  $\eta = \eta(\mathbf{r}_{ab} \cdot \mathbf{r}_{cd})$ . Letting  $x \equiv \mathbf{r}_{ab} \cdot \mathbf{r}_{cd}$ ,

$$\mathbf{r}_a \times \frac{\partial \eta}{\partial \mathbf{r}_a} = \frac{\partial \eta}{\partial x} \mathbf{r}_a \times \mathbf{r}_{cd} \quad (\text{S10.4})$$

Therefore,  $\sum_{a'} \mathbf{r}_{a'} \times \partial \eta / \partial \mathbf{r}_{a'}$  is given by

$$\begin{aligned} \sum_{a'} \mathbf{r}_{a'} \times \frac{\partial \eta}{\partial \mathbf{r}_{a'}} &= \mathbf{r}_a \times \frac{\partial \eta}{\partial \mathbf{r}_a} + \mathbf{r}_b \times \frac{\partial \eta}{\partial \mathbf{r}_b} + \mathbf{r}_c \times \frac{\partial \eta}{\partial \mathbf{r}_c} + \mathbf{r}_d \times \frac{\partial \eta}{\partial \mathbf{r}_d} \\ &= \frac{\partial \eta}{\partial x} (\mathbf{r}_a \times \mathbf{r}_{cd} - \mathbf{r}_b \times \mathbf{r}_{cd} + \mathbf{r}_c \times \mathbf{r}_{ab} - \mathbf{r}_{cd} \times \mathbf{r}_{ab}) \\ &= 0 \end{aligned} \quad (\text{S10.5})$$
